# Supplementary material
Source: PubMed Central journal article supplement (PMC4210284)
Supplement: pnas.201408759SI.pdf [file pnas.201408759SI.pdf]

# Supporting Information

Lin et al. 10.1073/pnas.1408759111

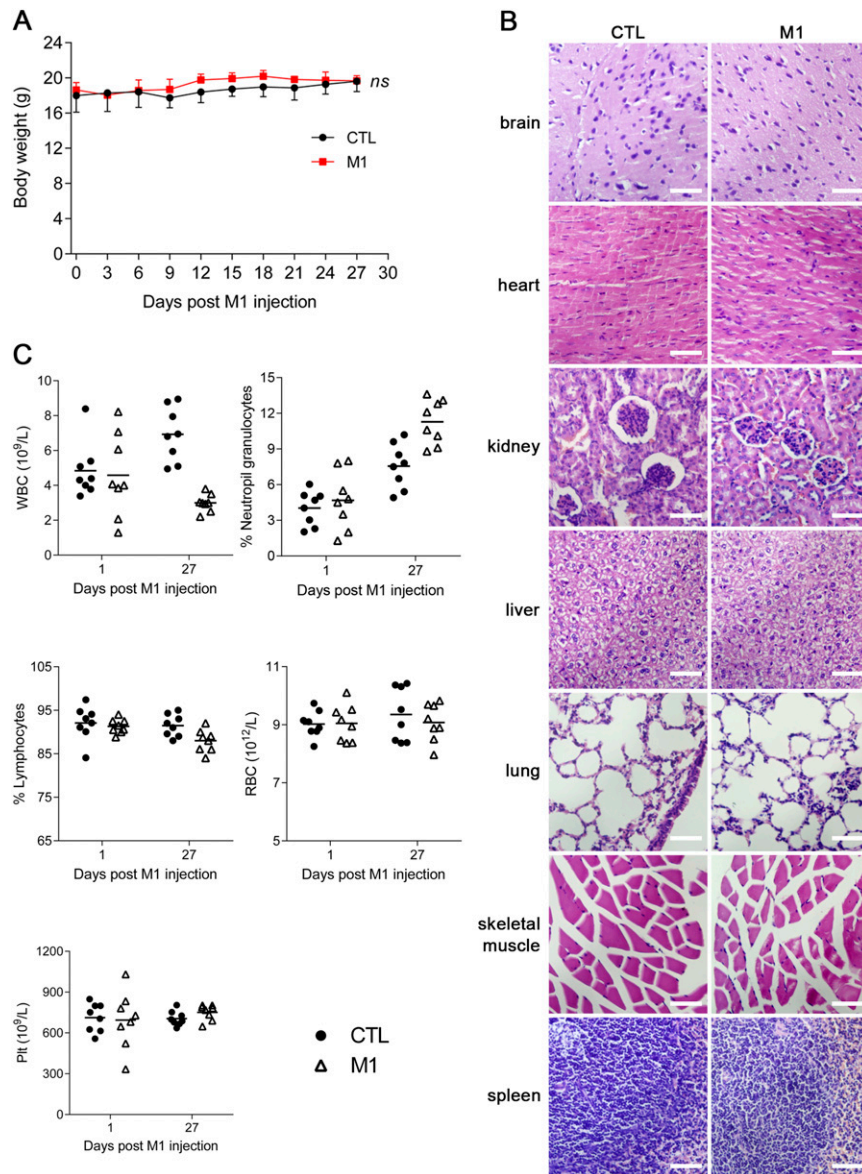

**Fig. S1.** Safety and potential toxicity evaluation of M1 in immunocompetent mice. Immunocompetent BALB/c mice received two doses of i.v. infusion of either M1 ( $3 \times 10^7$  pfu per dose) or vehicle. (A) Body weight was measured every 3 d. Means  $\pm$  SDs are shown.  $n = 8$  per group. (B) H&E staining of vital tissues. (Scale bars: 50  $\mu$ m.) (C) CBC analysis.  $n = 8$  per group. CTL, control; ns, not significant; Plt, platelet.

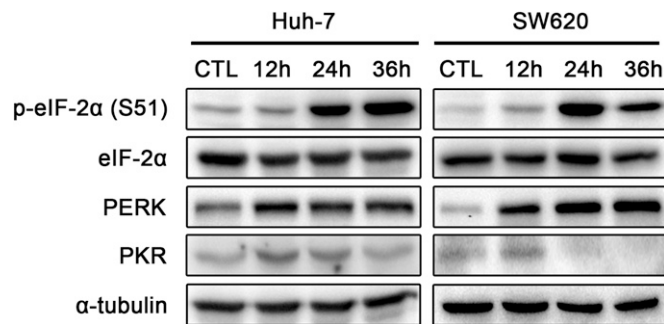

**Fig. S2.** Protein kinase R-like ER kinase (PERK), but not protein kinase R (PKR), is significantly induced by M1 infection. Sensitive cancer cells were treated with M1 (multiplicity of infection = 1) for 12, 24, or 36 h. Protein levels of eIF-2 $\alpha$  (eukaryotic translation initiation factor 2, subunit alpha) phosphorylation, PERK, and PKR were determined by Western blot, and  $\alpha$ -tubulin served as a loading control. CTL, control.

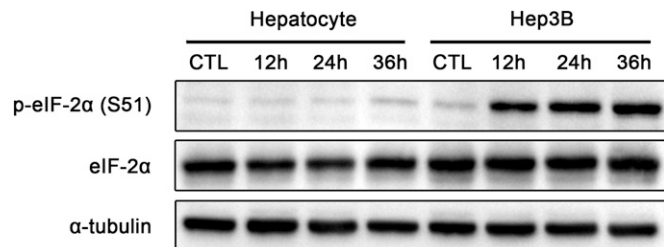

**Fig. S3.** Phosphorylation of eIF-2 $\alpha$  is slightly induced by M1 infection in primary human hepatocytes. Primary human hepatocytes and Hep3B cells were infected with M1 (multiplicity of infection = 10), and phosphorylation of eIF-2 $\alpha$  was determined by Western blot. Hep3B cells were used as a positive control of M1-induced phosphorylation of eIF-2 $\alpha$ . CTL, control.

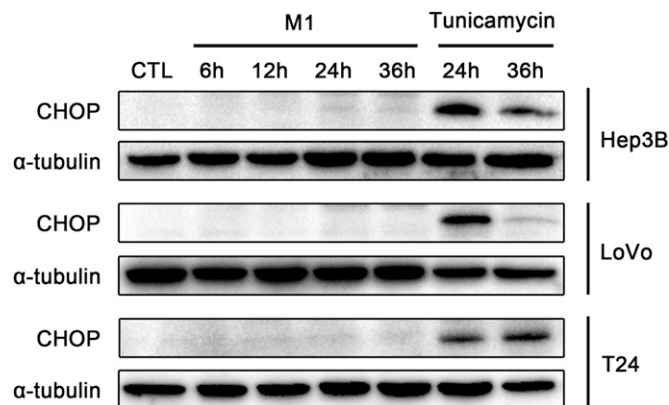

**Fig. S4.** CCAAT-enhancer-binding protein homologous protein (CHOP) is not induced by M1 infection. Sensitive cancer cells were treated with M1 (multiplicity of infection = 1) or tunicamycin (0.5  $\mu$ g/mL; positive control) for 6–36 h. Protein level of CHOP was determined by Western blot, and  $\alpha$ -tubulin served as a loading control. CTL, control.

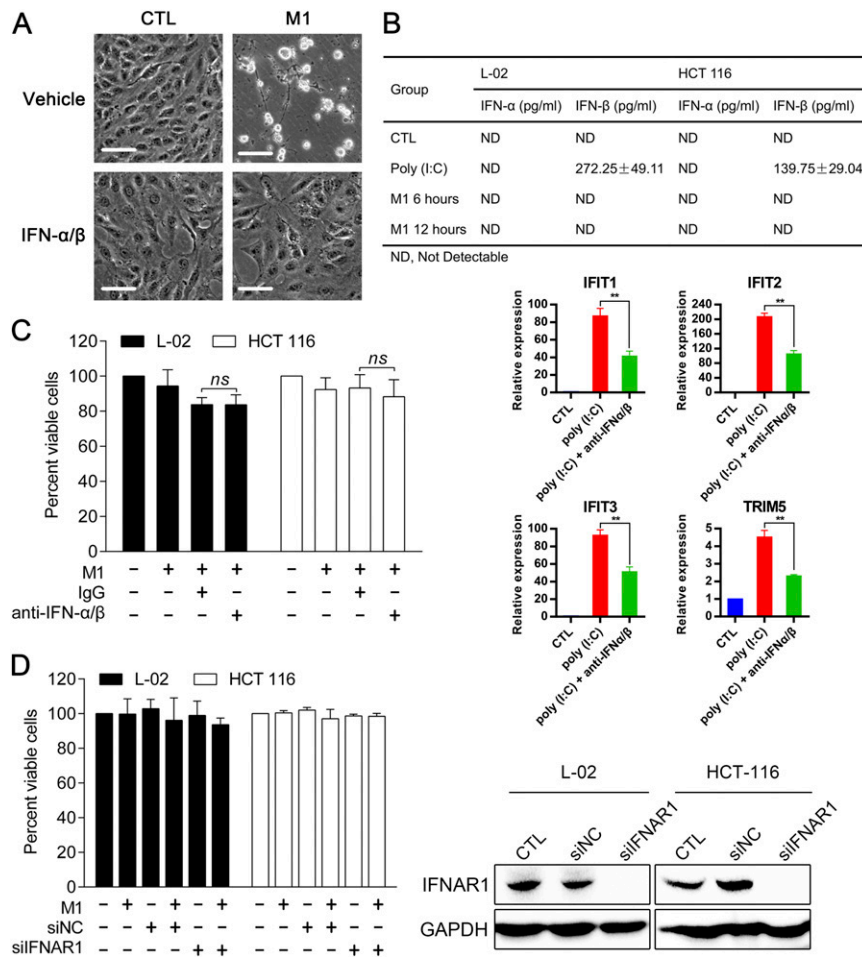

**Fig. S5.** M1 infection does not induce type I IFNs, and inhibition of type I IFN signal does not lead to M1 susceptibility in resistant cells. (A) T24 cells were pretreated with or without IFN- $\alpha/\beta$  (combination of 10,000 U/mL IFN- $\alpha$  and 30 ng/mL IFN- $\beta$ ) for 6 h before M1 infection [multiplicity of infection (MOI) = 1, 48 h]. Phase-contrast microscopy images were captured after infection. (Scale bars: 100  $\mu$ m.) (B) L-02 and HCT 116 cells were stimulated with poly(I:C) (5 mg/mL; positive control) or infected with M1 (MOI = 10). Supernatants were collected, and secreted IFN- $\alpha$  or IFN- $\beta$  was detected by ELISA. ND, not detectable. (C, Left) Cell viability in resistant cells infected with M1 (MOI = 10, 48 h) after 2 h of pretreatment with IFN- $\alpha$  and IFN- $\beta$  antibodies (800 ng/mL each). (C, Right) mRNA expression of IFN-stimulated genes.  $**P < 0.01$ . (D, Left) Resistant cells were transfected with a nontargeting siRNA or an IFNAR1-specific siRNA for 48 h before M1 infection. After 48 h of infection (MOI = 10), cell viability assays were performed. (D, Right) Detection of silencing efficiency. (C and D) Means  $\pm$  SDs from three independent experiments are shown. CTL, control; IFIT, interferon-induced protein with tetratricopeptide repeats; ns, not significant; siIFNAR1, IFN- $\alpha$  receptor subunit 1 siRNA; siNC, negative control siRNA; TRIM, tripartite motif-containing protein.

**Table S1. Human cell line screening for M1 anticancer efficacy**

| Cell line  | Disease                             | Viability (%) | Cell line  | Disease                        | Viability (%) |
|------------|-------------------------------------|---------------|------------|--------------------------------|---------------|
| Hep3B      | Hepatocellular carcinoma            | 3.8           | Ca Ski     | Cervix epidermoid carcinoma    | 87.0          |
| Huh-7      | Hepatocellular carcinoma            | 52.2          | SiHa       | Cervix squamous cell carcinoma | 99.6          |
| Huh-6      | Hepatoblastoma                      | 59.0          | ME-180     | Cervix epidermoid carcinoma    | 103.2         |
| SK-HEP-1   | Liver adenocarcinoma                | 71.2          | 22Rv1      | Prostate carcinoma             | 39.1          |
| Li-7       | Hepatoma                            | 72.1          | PC-3       | Prostate adenocarcinoma        | 72.7          |
| PLC        | Hepatoma                            | 80.5          | DU 145     | Prostate carcinoma             | 91.4          |
| HepG2      | Hepatocellular carcinoma            | 88.6          | A-375      | Skin malignant melanoma        | 47.3          |
| Bel-7402   | Hepatocellular carcinoma            | 99.6          | M14        | Melanoma                       | 92.1          |
| L-02       | Normal liver                        | 100.3         | MV3        | Melanoma                       | 114.0         |
| LoVo       | Colorectal adenocarcinoma           | 6.9           | U-87 MG    | Glioblastoma                   | 32.4          |
| HCT-8      | Colorectal adenocarcinoma           | 35.2          | U-251      | Glioblastoma                   | 34.7          |
| SW620      | Colorectal adenocarcinoma           | 43.7          | T98G       | Glioblastoma multiforme        | 38.2          |
| SW480      | Colorectal adenocarcinoma           | 53.8          | U-138 MG   | Glioblastoma                   | 40.1          |
| HCT 116    | Colorectal carcinoma                | 81.3          | MGR2       | Glioma                         | 63.2          |
| SCaBER     | Bladder squamous cell carcinoma     | 11.5          | DBTRG-05MG | Glioblastoma                   | 83.3          |
| T24        | Bladder transitional cell carcinoma | 21.1          | LN-229     | Glioblastoma                   | 98.6          |
| UM-UC-3    | Bladder transitional cell carcinoma | 39.8          | SF-767     | Glioblastoma                   | 98.6          |
| 5637       | Bladder carcinoma                   | 50.2          | A-172      | Glioblastoma                   | 98.7          |
| SW780      | Bladder transitional cell carcinoma | 88.0          | HEB        | Glia                           | 98.8          |
| EJ         | Bladder transitional cell carcinoma | 95.3          | Capan-1    | Pancreas adenocarcinoma        | 40.4          |
| J82        | Bladder transitional cell carcinoma | 96.8          | PANC-1     | Pancreas epithelioid carcinoma | 49.3          |
| SV-HUC-1   | Immortalized uroepithelial          | 97.2          | SW1990     | Pancreas adenocarcinoma        | 45.6          |
| A549       | Lung carcinoma                      | 68.2          | MIA PaCa-2 | Pancreas carcinoma             | 49.1          |
| NCI-H358   | Nonsmall cell lung cancer           | 87.8          | BxPC-3     | Pancreas adenocarcinoma        | 98.8          |
| H1299      | Nonsmall cell lung cancer           | 96.3          | NCI-N87    | Gastric carcinoma              | 76.4          |
| NCI-H460   | Large cell lung cancer              | 99.5          | HGC-27     | Gastric carcinoma              | 79.2          |
| HCC827     | Lung adenocarcinoma                 | 103.0         | AGS        | Gastric adenocarcinoma         | 92.3          |
| MRC-5      | Lung fibroblast                     | 76.1          | CNE-2      | Nasopharyngeal carcinoma       | 24.5          |
| MDA-MB-468 | Breast adenocarcinoma               | 43.7          | CNE-1      | Nasopharyngeal carcinoma       | 48.2          |
| MDA-MB-231 | Breast adenocarcinoma               | 58.9          | HNE-1      | Nasopharyngeal carcinoma       | 76.5          |
| T-47D      | Mammary ductal carcinoma            | 86.5          | HL-60      | Acute promyelocytic leukemia   | 85.2          |
| SK-BR-3    | Breast adenocarcinoma               | 89.6          | K-562      | Chronic myelogenous leukemia   | 95.1          |
| MCF7       | Breast adenocarcinoma               | 95.2          | CCRF-CEM   | Acute lymphoblastic leukemia   | 110.3         |
| C-33 A     | Cervix carcinoma                    | 14.8          | HEL        | Erythroleukemia                | 112.0         |
| HeLa       | Cervix adenocarcinoma               | 66.0          | Reh        | Acute lymphocytic leukemia     | 113.1         |

Different cells were treated with M1 (multiplicity of infection = 10) for 48 h, and cell viability was detected by 3-(4,5-dimethylthiazol-2-yl)-2,5-diphenyltetrazolium bromide assay.

**Table S2. Cancer specificity of M1 in primary human cells**

| Name   | Tissue                                  | Source     | Time (hpi) | Viability (%) |       |       |       |       |
|--------|-----------------------------------------|------------|------------|---------------|-------|-------|-------|-------|
|        |                                         |            |            | 0.01          | 0.1   | 1     | 10    | 100   |
| HAEC   | Human aortic endothelial cell           | ScienCell* | 96         | 101.4         | 99.9  | 95.3  | 98.5  | 96.7  |
| HSkMC  | Human skeletal muscle cell              | ScienCell  | 96         | 103.4         | 101.2 | 99.3  | 95.7  | 95.5  |
| HCM    | Human cardiac myocyte                   | ScienCell  | 96         | 104.9         | 95.7  | 94.0  | 89.6  | 88.5  |
| HBdSMC | Human bladder smooth muscle cell        | ScienCell  | 96         | 102.7         | 116.4 | 115.4 | 112.1 | 113.6 |
| HRGEC  | Human renal glomerular endothelial cell | ScienCell  | 96         | 101.8         | 101.4 | 110.2 | 104.8 | 108.1 |
| HH     | Human hepatocyte                        | ScienCell  | 96         | 103.5         | 107.6 | 104.3 | 91.7  | 103.7 |
| HCEpiC | Human colorectal epithelial cell        | Isolated   | 96         | 101.9         | 109.6 | 109.0 | 104.6 | 104.1 |
| HCRC1  | Human colorectal carcinoma cell         | Isolated   | 72         | 93.3          | 106.6 | 100.6 | 87.2  | 67.0  |
| HCC1   | Human hepatocellular carcinoma cell     | Isolated   | 72         | 77.8          | 44.2  | 34.7  | 27.5  | 23.1  |
| HCC2   | Human hepatocellular carcinoma cell     | Isolated   | 72         | 101.2         | 85.8  | 89.6  | 73.6  | 66.4  |
| HCC3   | Human hepatocellular carcinoma cell     | Isolated   | 72         | 99.8          | 100.6 | 87.9  | 79.5  | 68.6  |

Primary human cells were treated with M1 (MOI = 0.01~100), and cell viability was detected by 3-(4,5-dimethylthiazol-2-yl)-2,5-diphenyltetrazolium bromide assay. hpi, hours postinfection.

\*ScienCell Research Laboratories.

**Table S3. Inclusion criteria for IFN-related genes**

| Database or reference                                                                                                                                                                                                                         | Inclusion criteria                                                                                    |
|-----------------------------------------------------------------------------------------------------------------------------------------------------------------------------------------------------------------------------------------------|-------------------------------------------------------------------------------------------------------|
| Interferome ( <a href="http://interferome.its.monash.edu.au/interferome/">http://interferome.its.monash.edu.au/interferome/</a> )<br>ISG Database ( <a href="http://lerner.ccf.org/labs/williams/">http://lerner.ccf.org/labs/williams/</a> ) | ISGs reported in two or more of these three sets of ISGs were included in our study (type I IFN only) |
| 1                                                                                                                                                                                                                                             |                                                                                                       |
| 2                                                                                                                                                                                                                                             | Genes reported in TLR-dependent and -independent pathways of type I IFN induction were included       |

ISG, IFN-stimulated gene; TLR, toll-like receptor.

- Schoggins JW, et al. (2011) A diverse range of gene products are effectors of the type I interferon antiviral response. *Nature* 472(7344):481–485.
- Baccala R, Hoebe K, Kono DH, Beutler B, Theofilopoulos AN (2007) TLR-dependent and TLR-independent pathways of type I interferon induction in systemic autoimmunity. *Nat Med* 13(5):543–551.

**Table S4. Expression of IFN-related genes in L-02 and Hep3B cells**

| Gene symbol | Fold change in L-02/Hep3B cells |
|-------------|---------------------------------|
| GBP3        | 71.39                           |
| CHMP5       | 53.12                           |
| SCARB2      | 49.01                           |
| IFI16       | 48.52                           |
| ODC1        | 45.88                           |
| SEPHS2      | 45.06                           |
| EPAS1       | 42.49                           |
| GNAI1       | 42.34                           |
| ZC3HAV1     | 40.40                           |
| PNPT1       | 39.24                           |
| MAFF        | 39.17                           |
| EIF2AK2     | 37.96                           |
| ADAR        | 37.94                           |
| SLC1A1      | 37.87                           |
| CYP1B1      | 37.72                           |
| GCH1        | 35.75                           |
| FAM46A      | 35.11                           |
| HIST1H2AC   | 34.63                           |
| CRY1        | 33.73                           |
| STAT3       | 33.71                           |
| TBK1        | 29.20                           |
| TICAM2      | 28.77                           |
| RECQL       | 26.16                           |
| MICB        | 25.66                           |
| PMAIP1      | 25.03                           |
| OPTN        | 23.80                           |
| IMPA2       | 21.74                           |
| CLEC2B      | 21.50                           |
| UCP2        | 20.80                           |
| ADM         | 20.42                           |
| DYNLT1      | 19.94                           |
| IFIT3       | 19.87                           |
| LIPA        | 19.55                           |
| PDGFA       | 19.41                           |
| STAT1       | 18.69                           |
| NMI         | 17.72                           |
| UBE2N       | 16.98                           |
| TRIM5       | 16.76                           |
| NAMPT       | 16.52                           |
| SAMHD1      | 16.49                           |
| DDIT4       | 16.48                           |
| NET1        | 15.26                           |
| VEGFC       | 15.04                           |
| BST2        | 14.73                           |
| HLA-A       | 14.06                           |
| IFITM2      | 13.97                           |





**Table S4. Cont.**

| Gene symbol | Fold change in L-02/Hep3B cells |
|-------------|---------------------------------|
| IRF9        | 1.07                            |
| UBE2L6      | 1.05                            |
| TRIM21      | 1.00                            |
| MT1X        | 1.00                            |
| CCL2        | 0.98                            |
| PLAUR       | 0.98                            |
| OAS3        | 0.97                            |
| PSMB10      | 0.96                            |
| MAX         | 0.95                            |
| TRAF6       | 0.94                            |
| TYK2        | 0.94                            |
| BTG1        | 0.92                            |
| IRF2        | 0.91                            |
| IRF3        | 0.90                            |
| PLSCR1      | 0.88                            |
| IFI44       | 0.87                            |
| FUT4        | 0.87                            |
| BAK1        | 0.85                            |
| ARNTL       | 0.83                            |
| DDX3X       | 0.83                            |
| PRIC285     | 0.83                            |
| RNF213      | 0.83                            |
| SAMD4A      | 0.82                            |
| IL6         | 0.81                            |
| MX2         | 0.80                            |
| LMO2        | 0.78                            |
| IFITM1      | 0.78                            |
| UBE2V1      | 0.78                            |
| SECTM1      | 0.78                            |
| JAK2        | 0.76                            |
| GEM         | 0.76                            |
| TLK2        | 0.75                            |
| RNF19B      | 0.75                            |
| OGFR        | 0.75                            |
| CD47        | 0.74                            |
| MX1         | 0.74                            |
| CXCL11      | 0.74                            |
| TLR7        | 0.71                            |
| TREX1       | 0.71                            |
| MT1M        | 0.70                            |
| TNFSF10     | 0.69                            |
| TRADD       | 0.68                            |
| IRF1        | 0.68                            |
| PPM1K       | 0.66                            |
| IL1B        | 0.65                            |
| HESX1       | 0.64                            |
| IKBKB       | 0.64                            |
| PDGFRL      | 0.63                            |
| TICAM1      | 0.63                            |
| MAPK1       | 0.63                            |
| CD58        | 0.63                            |
| TYMP        | 0.62                            |
| PIM1        | 0.61                            |
| CCNA1       | 0.60                            |
| STARD5      | 0.60                            |
| RNASEL      | 0.60                            |
| MAP3K14     | 0.60                            |
| IRF7        | 0.57                            |
| LY6E        | 0.56                            |
| TRIM14      | 0.56                            |
| MT1H        | 0.56                            |
| N4BP1       | 0.55                            |



**Table S4. Cont.**

| Gene symbol | Fold change in L-02/Hep3B cells |
|-------------|---------------------------------|
| ISG20       | 0.54                            |
| TIRAP       | 0.54                            |
| DUSP5       | 0.54                            |
| TNFSF13B    | 0.54                            |
| THBS1       | 0.53                            |
| FAM46C      | 0.53                            |
| CDK18       | 0.53                            |
| APOL6       | 0.52                            |
| GBP4        | 0.51                            |
| CCL8        | 0.51                            |
| IRAK1       | 0.51                            |
| SERPINE1    | 0.51                            |
| CD69        | 0.50                            |
| TMEM140     | 0.49                            |
| VEGFA       | 0.48                            |
| HLA-F       | 0.48                            |
| BRF2        | 0.48                            |
| PML         | 0.48                            |
| IKBKE       | 0.47                            |
| CCR1        | 0.47                            |
| GMPR        | 0.45                            |
| CD163       | 0.44                            |
| OAS2        | 0.44                            |
| IFI27       | 0.44                            |
| SERPINB3    | 0.43                            |
| AIM2        | 0.42                            |
| SERPING1    | 0.42                            |
| IL15RA      | 0.42                            |
| C4BPA       | 0.42                            |
| FUT2        | 0.41                            |
| HSH2D       | 0.41                            |
| ATF3        | 0.40                            |
| RELA        | 0.39                            |
| NAPA        | 0.39                            |
| AXL         | 0.39                            |
| TLR8        | 0.38                            |
| APOL3       | 0.37                            |
| SHMT2       | 0.37                            |
| CD274       | 0.37                            |
| HBEGF       | 0.36                            |
| DHX58       | 0.36                            |
| C10orf10    | 0.36                            |
| PLEKHA4     | 0.36                            |
| SPATS2L     | 0.36                            |
| HLA-G       | 0.35                            |
| RTP4        | 0.35                            |
| FZD5        | 0.34                            |
| MAZ         | 0.34                            |
| BCL2L14     | 0.34                            |
| EGR1        | 0.34                            |
| APOL1       | 0.34                            |
| EHD4        | 0.33                            |
| CD38        | 0.33                            |
| CX3CL1      | 0.32                            |
| MAPK3       | 0.31                            |
| EPST11      | 0.31                            |
| SLC15A3     | 0.31                            |
| ADAM11      | 0.31                            |
| CXCL10      | 0.31                            |
| CDKN1A      | 0.30                            |
| LGALS9      | 0.29                            |
| SERPINB9    | 0.29                            |

**Table S4. Cont.**

| Gene symbol | Fold change in L-02/Hep3B cells |
|-------------|---------------------------------|
| MYC         | 0.29                            |
| IRF5        | 0.29                            |
| RARRES3     | 0.28                            |
| UBA7        | 0.28                            |
| XAF1        | 0.28                            |
| CCL5        | 0.27                            |
| IL1RN       | 0.27                            |
| RSAD2       | 0.27                            |
| CD74        | 0.27                            |
| ETV7        | 0.26                            |
| BATF2       | 0.25                            |
| P2RY6       | 0.25                            |
| TAB1        | 0.25                            |
| CXCL9       | 0.24                            |
| TNF         | 0.24                            |
| SAT1        | 0.23                            |
| IDO1        | 0.22                            |
| JUN         | 0.21                            |
| INHBA       | 0.20                            |
| TAGAP       | 0.19                            |
| SOCS1       | 0.19                            |
| VAMP5       | 0.18                            |
| FST         | 0.16                            |

**Table S5. RNAi screening of IFN-related genes**

| Gene    | (siX + M1)/siX | z Score | Gene   | (siX + M1)/siX | z score |
|---------|----------------|---------|--------|----------------|---------|
| ZC3HAV1 | 0.71           | -0.40   | DDIT4  | 1.20           | 0.01    |
| IFIT2   | 0.87           | -0.26   | IFIH1  | 1.21           | 0.02    |
| IFI6    | 0.90           | -0.24   | IFI16  | 1.22           | 0.03    |
| RNF114  | 0.91           | -0.23   | TLR3   | 1.23           | 0.04    |
| GBP3    | 0.94           | -0.20   | NC     | 1.23           | 0.04    |
| IL8     | 0.94           | -0.20   | IFIT3  | 1.24           | 0.04    |
| UBE2N   | 0.97           | -0.18   | RBCK1  | 1.25           | 0.05    |
| ADAR    | 0.98           | -0.17   | ISG15  | 1.26           | 0.07    |
| IFIT1   | 1.01           | -0.15   | WARS   | 1.26           | 0.07    |
| MAVS    | 1.01           | -0.15   | NT     | 1.26           | 0.07    |
| MYD88   | 1.01           | -0.14   | USP4   | 1.27           | 0.07    |
| PSME1   | 1.01           | -0.14   | NMI    | 1.28           | 0.08    |
| IFIT5   | 1.02           | -0.14   | TRAF3  | 1.31           | 0.11    |
| STAT1   | 1.02           | -0.14   | TRIM25 | 1.34           | 0.13    |
| JAK1    | 1.03           | -0.13   | IFI30  | 1.34           | 0.13    |
| STAT2   | 1.03           | -0.13   | TAP1   | 1.34           | 0.13    |
| EIF2AK2 | 1.05           | -0.11   | BST2   | 1.35           | 0.14    |
| PNPT1   | 1.06           | -0.11   | OAS1   | 1.37           | 0.16    |
| TAB2    | 1.06           | -0.10   | TBK1   | 1.39           | 0.17    |
| IER3    | 1.07           | -0.10   | TRIM5  | 1.40           | 0.18    |
| PSMB8   | 1.08           | -0.09   | TRIM22 | 1.40           | 0.19    |
| PMAIP1  | 1.09           | -0.08   | NAMPT  | 1.43           | 0.21    |
| PRKRA   | 1.09           | -0.08   | SAMHD1 | 1.43           | 0.21    |
| PARP12  | 1.14           | -0.04   | GBP1   | 1.49           | 0.26    |
| IFITM3  | 1.15           | -0.03   | TICAM2 | 1.50           | 0.26    |
| TAP2    | 1.15           | -0.03   | IFITM2 | 1.55           | 0.31    |
| ATF2    | 1.15           | -0.03   | BTN3A3 | 1.94           | 0.64    |
| DDX60   | 1.17           | -0.01   |        |                |         |

Data are ranked by relative cell count (siX + M1/siX). z Scores are included to show distribution. NC, scramble siRNA; NT, nontransfected.
